# Supplementary material
Source: PubMed Central journal article supplement (PMC7324508)
Supplement: supp_RA120.013087_158899_2_supp_502584_q81xpv.pdf [file supp_RA120.013087_158899_2_supp_502584_q81xpv.pdf]

**Supplementary Table 1. Crystallographic data processing and refinement.**

| mutant                                     | N2D                                     | K3N                                  | K21Q                                    | L27D                                    | R30Q                                    | K31Q                                    | L35S                                    | P38G                                   | K45S                                          | K65Q                                   | R88Q                                    | K112Q                                   | K120S                                  |
|--------------------------------------------|-----------------------------------------|--------------------------------------|-----------------------------------------|-----------------------------------------|-----------------------------------------|-----------------------------------------|-----------------------------------------|----------------------------------------|-----------------------------------------------|----------------------------------------|-----------------------------------------|-----------------------------------------|----------------------------------------|
| space group                                | P4 <sub>2</sub> ,2 <sub>1</sub>         | P4 <sub>2</sub> ,2 <sub>1</sub>      | P4 <sub>2</sub> ,2 <sub>1</sub>         | P4 <sub>2</sub> ,2 <sub>1</sub>         | P2 <sub>2</sub> ,2 <sub>1</sub>         | P4 <sub>2</sub> ,2 <sub>1</sub>         | P4 <sub>2</sub> ,2 <sub>1</sub>         | P2 <sub>2</sub> ,2 <sub>1</sub>        | C2                                            | P4 <sub>3</sub>                        | P4 <sub>2</sub> ,2 <sub>1</sub>         | P4 <sub>2</sub> ,2 <sub>1</sub>         | P4 <sub>2</sub> ,2 <sub>1</sub>        |
| unit cell dimensions<br>(Å, Å, Å, °, °, °) | 58.26<br>58.26<br>101.72<br>90 90<br>90 | 64.5<br>64.5<br>101.2<br>90 90<br>90 | 57.96<br>57.96<br>101.24<br>90 90<br>90 | 64.88<br>64.88<br>100.92<br>90 90<br>90 | 58.59<br>75.96<br>100.63<br>90 90<br>90 | 58.24<br>58.24<br>102.19<br>90 90<br>90 | 65.83<br>65.83<br>101.32<br>90 90<br>90 | 55.54<br>65.49<br>82.23<br>90 90<br>90 | 120.13<br>63.61<br>94.47<br>90<br>130.1<br>90 | 83.03<br>83.03<br>77.90<br>90 90<br>90 | 64.88<br>64.88<br>264.35<br>90 90<br>90 | 65.71<br>65.71<br>101.19<br>90 90<br>90 | 63.68<br>63.68<br>101.4<br>90 90<br>90 |
| resolution range (Å)                       | 30-1.65<br>(1.70-1.65)                  | 20-2-70<br>(2.77-2.70)               | 30-2.30<br>(2.36-2.30)                  | 30-2.31<br>(2.37-2.31)                  | 25-3.0<br>(3.08-3.00)                   | 40-1.80<br>(1.85-1.80)                  | 25-2.00<br>(2.05-2.00)                  | 20-1.80<br>(1.85-1.80)                 | 20-2.20<br>(2.26-2.20)                        | 20-1.20<br>(1.23-1.20)                 | 40-1.80<br>(1.85-1.80)                  | 25-1.80<br>(1.85-1.80)                  | 40-2.90<br>(2.98-2.90)                 |
| completeness (%)                           | 97.4<br>(78.9)                          | 99.5<br>(100)                        | 99.2<br>(97.6)                          | 98.9<br>(94.6)                          | 98.4<br>(95.5)                          | 98.7<br>(99.8)                          | 98.2<br>(99.8)                          | 90.9<br>(58.4)                         | 88.0<br>(49.2)                                | 93.9<br>(63.2)                         | 99.4<br>(96.8)                          | 99.4<br>(95.6)                          | 99.6<br>(97.4)                         |
| $\langle 1/\sigma \rangle$                 | 15.2<br>(1.5)                           | 14.5<br>(3.1)                        | 11.1<br>(2.2)                           | 8.0<br>(0.9)                            | 9.0<br>(1.2)                            | 19.0<br>(2.5)                           | 19.8<br>(1.7)                           | 21.8<br>(2.2)                          | 11.0<br>(1.6)                                 | 19.5<br>(1.4)                          | 19.8<br>(2.0)                           | 30.2<br>(2.0)                           | 10.5<br>(1.8)                          |
| redundancy                                 | 4.7<br>(2.0)                            | 10.7<br>(11.2)                       | 5.1<br>(4.7)                            | 7.9<br>(4.7)                            | 4.7<br>(4.6)                            | 9.5<br>(9.2)                            | 12.3<br>(9.7)                           | 5.5<br>(3.7)                           | 3.4<br>(2.8)                                  | 5.1<br>(2.1)                           |                                         | 11.8<br>(11.2)                          | 7.2<br>(7.3)                           |
| R <sub>sym</sub> (%)                       | 8.0<br>(54.1)                           | 17.3<br>(80.0)                       | 13.8<br>(75.5)                          | 21.7<br>(197.1)                         | 12.6<br>(168.0)                         | 11.1<br>(92.6)                          | 10.0<br>(149.2)                         | 4.9<br>(57.6)                          | 7.8<br>(62.3)                                 | 4.1<br>(66.1)                          | 7.9<br>(77.3)                           | 6.1<br>(126.7)                          | 13.3<br>(106.5)                        |
| completeness after anisotropic truncation  |                                         |                                      |                                         | 81.5                                    | 84.7                                    |                                         | 86.3                                    |                                        |                                               |                                        |                                         |                                         |                                        |
| R <sub>work</sub> (%)                      | 14.6                                    | 21.2                                 | 18.8                                    | 18.8                                    | 25.4                                    | 14.5                                    | 17.0                                    | 16.7                                   | 19.4                                          | 13.1                                   | 15.9                                    | 17.8                                    | 21.0                                   |
| R <sub>free</sub> (%)                      | 18.8                                    | 25.0                                 | 22.4                                    | 24.5                                    | 28.9                                    | 18.9                                    | 21.3                                    | 22.5                                   | 25.2                                          | 15.4                                   | 19.9                                    | 20.3                                    | 25.7                                   |
| RMSD bond length (Å)                       | 0.009                                   | 0.002                                | 0.003                                   | 0.003                                   | 0.003                                   | 0.008                                   | 0.012                                   | 0.012                                  | 0.004                                         | 0.010                                  | 0.010                                   | 0.012                                   | 0.003                                  |
| RMSD bond angle (°)                        | 1.1                                     | 0.5                                  | 0.6                                     | 0.5                                     | 0.6                                     | 1.0                                     | 1.0                                     | 1.2                                    | 0.8                                           | 1.1                                    | 1.1                                     | 1.4                                     | 0.5                                    |
| Ramachandran favoured (%)                  | 99.3                                    | 99.2                                 | 98.5                                    | 98.5                                    | 93.9                                    | 100                                     | 98.6                                    | 96.5                                   | 98.0                                          | 99.2                                   | 100                                     | 100                                     | 96.2                                   |
| Ramachandran outliers (%)                  | 0                                       | 0                                    | 0                                       | 0                                       | 0.4                                     | 0                                       | 0                                       | 0.4                                    | 0                                             | 0                                      | 0                                       | 0                                       | 0                                      |
| Molprobit score, percentile                | 1.15,<br>99th                           | 1.31,<br>100th                       | 0.99,<br>100th                          | 0.67<br>(100th)                         | 2.03<br>(99th)                          | 1.17<br>(99th)                          | 1.14,<br>100th                          | 1.62,<br>89th                          | 1.82<br>(93rd)                                | 1.41<br>(81st)                         | 1.45<br>(96th)                          | 1.78<br>(80th)                          | 1.68<br>(100th)                        |
| PDB entry                                  | 6xu5                                    | 6xu9                                 | 6xua                                    | 6xuw                                    | 6sts                                    | 6xvq                                    | 6xvr                                    | 6xvs                                   | 4a1h                                          | 4a1y                                   | 6xvy                                    | 4a8z                                    | 6xw9                                   |
